# Supplementary material for: CRISPR/Cas9-mediated gene knockout of NANOG and NANOGP8 decreases the malignant potential of prostate cancer cells
Source: PubMed Central journal article supplement (PMC4673169; doi:10.18632/oncotarget.4293), 2015-06-15
Supplement: oncotarget-06-22361-s001.pdf [file oncotarget-06-22361-s001.pdf]

## SUPPLEMENTARY FIGURE AND TABLE

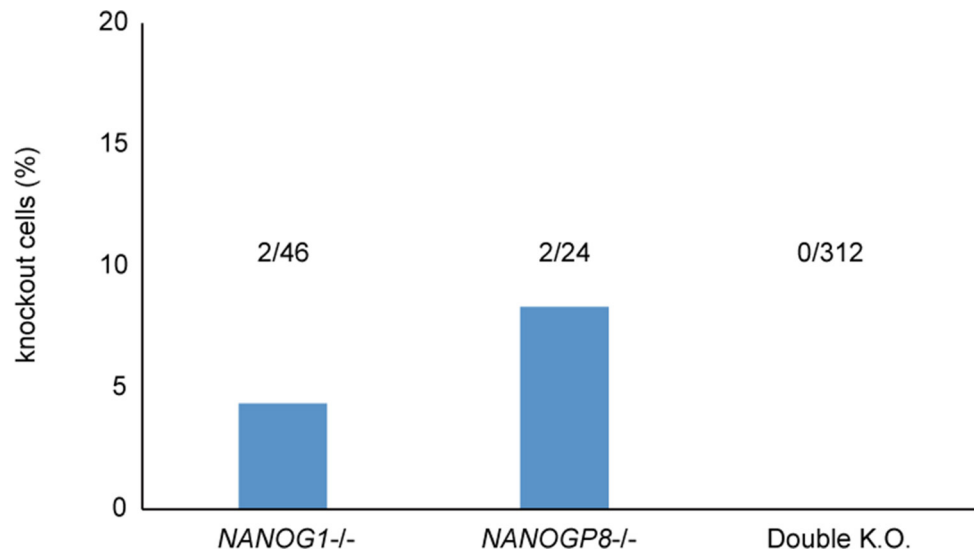

**Supplementary Figure 1: The proportion of the knockout cells among candidate cells.** We found 2 *NANOG1*-knockout cells out of 46 colonies of candidate, and found 2 *NANOGP8*-knockout cells out 24 colonies of candidate. However, we could not find *NANOG1*- and *NANOGP8*-double knockout cells, instead of picking up more than 300 colonies of candidate.

**Supplementary Table 1: Primers used in this research**

|                      |                          |                                                               |
|----------------------|--------------------------|---------------------------------------------------------------|
| <i>NANOG1_gw_F</i>   | ATCTGGGGTTCTGGGAATTATC   | Cloning for <i>NANOG1</i> intron1-exon2                       |
| <i>NANOG1_gw_R</i>   | GGTCTGTGCAAGAAAGTGGTTA   | Cloning for <i>NANOG1</i> intron1-exon2                       |
| <i>NANOGP8_gw_F1</i> | TGTGTGAAAGTGAGATGGGAAC   | Cloning for sequence analysis of <i>NANOGP8</i> gene knockout |
| <i>NANOGP8_gw_R1</i> | ACACTCGGTGAAATCAGGGTAA   | Cloning for sequence analysis of <i>NANOGP8</i> gene knockout |
| <i>NANOGP8_gw_F2</i> | CTTGCTTTGAAGAATCCGACTG   | Cloning for sequence analysis of <i>NANOGP8</i> gene knockout |
| <i>NANOGP8_gw_R2</i> | CACAAATCACAGGCATAGGTGA   | Cloning for sequence analysis of <i>NANOGP8</i> gene knockout |
| <i>NANOGP1_gw_F</i>  | GAATCTCTTGAACCTGGGAAGC   | Cloning for <i>NANOGP1</i> genomic region                     |
| <i>NANOGP1_gw_R</i>  | TGGAGGCTGAGGTATTTCTGTC   | Cloning for <i>NANOGP1</i> genomic region                     |
| <i>NANOGP2_gw_F</i>  | GCCTGGCTTCAAAGCATCT      | Cloning for <i>NANOGP2</i> genomic region                     |
| <i>NANOGP2_gw_R</i>  | TCTTGCATCTGTTGAAGGCTGA   | Cloning for <i>NANOGP2</i> genomic region                     |
| <i>NANOGP3_gw_F</i>  | AGTGCCACCATAACATGGCTAAT  | Cloning for <i>NANOGP3</i> genomic region                     |
| <i>NANOGP3_gw_R</i>  | ACACCATTGCTACCCTTTGG     | Cloning for <i>NANOGP3</i> genomic region                     |
| <i>NANOGP4_gw_F</i>  | AGGCTTGGCATCATTTTCATC    | Cloning for <i>NANOGP4</i> genomic region                     |
| <i>NANOGP4_gw_R</i>  | ACACAGCTGGGTGGAAGAAAAC   | Cloning for <i>NANOGP4</i> genomic region                     |
| <i>NANOGP5_gw_F</i>  | CATCCAGCTTGTCCAAAACC     | Cloning for <i>NANOGP5</i> genomic region                     |
| <i>NANOGP5_gw_R</i>  | TGGAGGCTGAGGTATTTCTGTC   | Cloning for <i>NANOGP5</i> genomic region                     |
| <i>NANOGP6_gw_F</i>  | CCAAAGCCTGCCTTATTCTAAA   | Cloning for <i>NANOGP6</i> genomic region                     |
| <i>NANOGP6_gw_R</i>  | GGGTATTGAAAGTTCTTGCAG    | Cloning for <i>NANOGP6</i> genomic region                     |
| <i>NANOGP7_gw_F</i>  | CCAACGCATCCGTCTGTAA      | Cloning for <i>NANOGP7</i> genomic region                     |
| <i>NANOGP7_gw_R</i>  | CATCTGCTGGAGGCTGAAGTAT   | Cloning for <i>NANOGP7</i> genomic region                     |
| <i>NANOGP8_gw_F</i>  | CTTGCTTTGAAGAATCCGACTG   | Cloning for <i>NANOGP8</i> genomic region                     |
| <i>NANOGP8_gw_R</i>  | TGGAGGCTGAGGTATTTCTGTC   | Cloning for <i>NANOGP8</i> genomic region                     |
| <i>NANOGP9_gw_F</i>  | AAGCTGTTTTGCTAGACTGAGCTG | Cloning for <i>NANOGP9</i> genomic region                     |
| <i>NANOGP9_gw_R</i>  | TCTGGTCTTCTGTTTCTTGACTGG | Cloning for <i>NANOGP9</i> genomic region                     |
| <i>NANOGP10_gw_F</i> | GGGATGGAATGAGGAATGTG     | Cloning for <i>NANOGP10</i> genomic region                    |
| <i>NANOGP10_gw_R</i> | GTGGAACGGAACACAGTTTGG    | Cloning for <i>NANOGP10</i> genomic region                    |
| multi-NANOG_F1       | AGATGCCTCACACGGAGACT     | Cloning for <i>NANOG1'</i> and its pseudogene' transcripts    |
| multi-NANOG_R1       | CTCCAACATCCTGAACCTCAG    | Cloning for <i>NANOG1'</i> and its pseudogene' transcripts    |
| multi-NANOG_F2       | ACAGGTGAAGACCTGGTTCC     | Cloning for <i>NANOG1'</i> and its pseudogene' transcripts    |
| multi-NANOG_R2       | GGAACAATTCAACCTGGAGC     | Cloning for <i>NANOG1'</i> and its pseudogene' transcripts    |
| multi-NANOG_F3       | GCCTGGAACAGTCCCTTCTA     | Cloning for <i>NANOG1'</i> and its pseudogene' transcripts    |
| multi-NANOG_R3       | ACTCCACAAACCATGGATTTATTC | Cloning for <i>NANOG1'</i> and its pseudogene' transcripts    |
